# Supplementary material for: OsLEA1b Modulates Starch Biosynthesis at High Temperatures in Rice
Source: MDPI journal article supplement (doi:10.3390/plants12234070), 2023-12-04
Supplement: s1 [file s1]

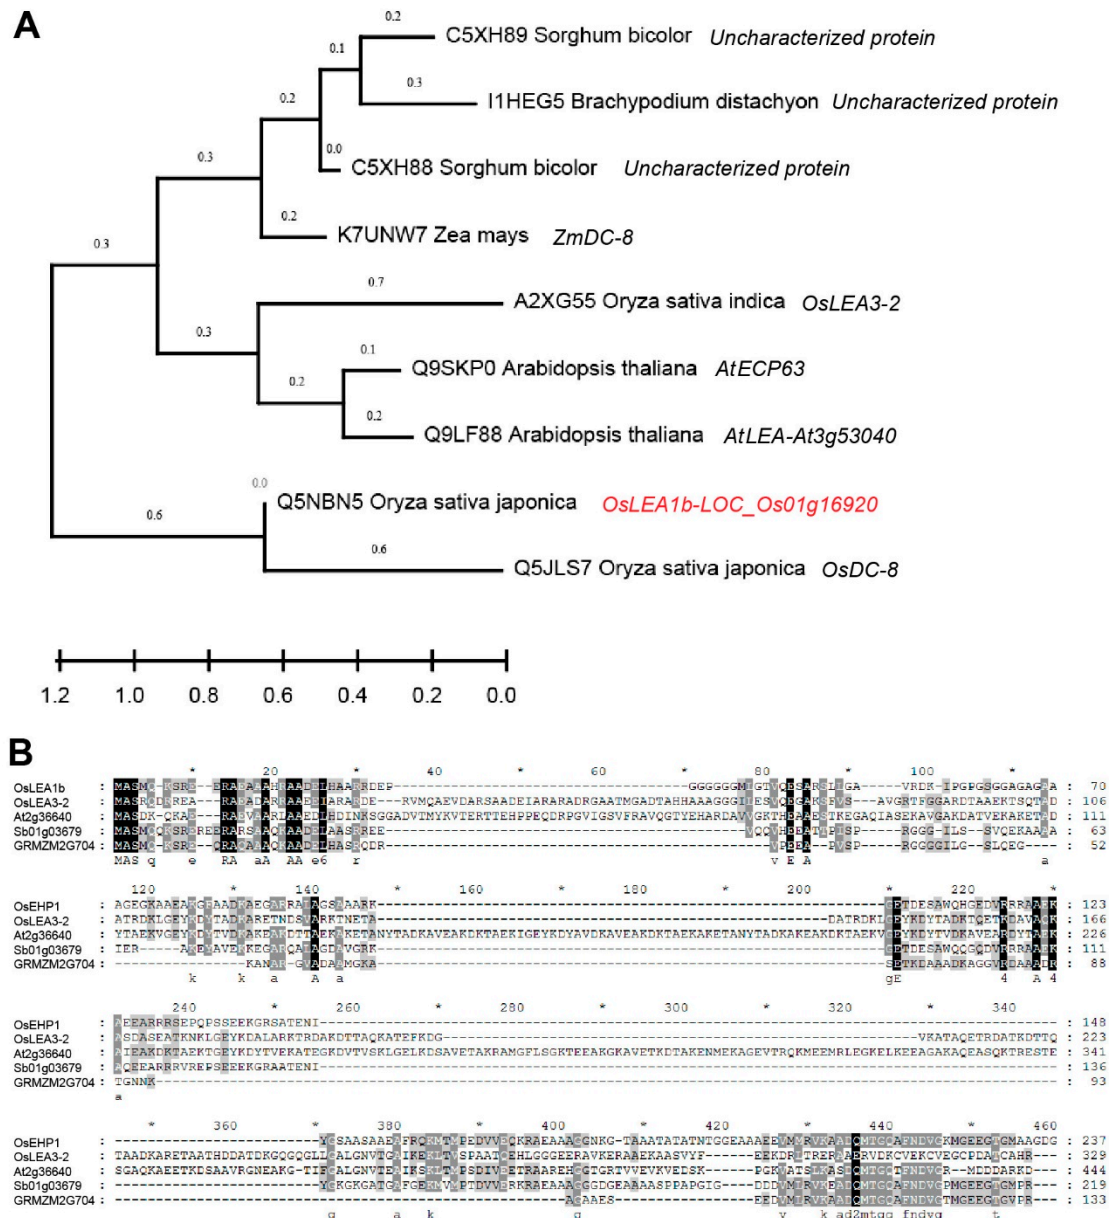

Figure S1. Phylogenetic analysis and amino acid sequence alignment of OsLEA1b.

(A) Phylogenetic analysis of *OsLEA1b*. The neighbor-joining tree was generated with MEGA7 after aligning the full-length protein sequences. Distances are evaluated using the neighbor-joining algorithm. (B) Amino acid sequence alignment between part of *OsLEA1b* and other homologous proteins. The sequences alignment was generated with ClustalX2. White alphabet with black background means 100% identity, white alphabet with grey background represents 80% identity, and black alphabet with light grey background stands for 60% identity.

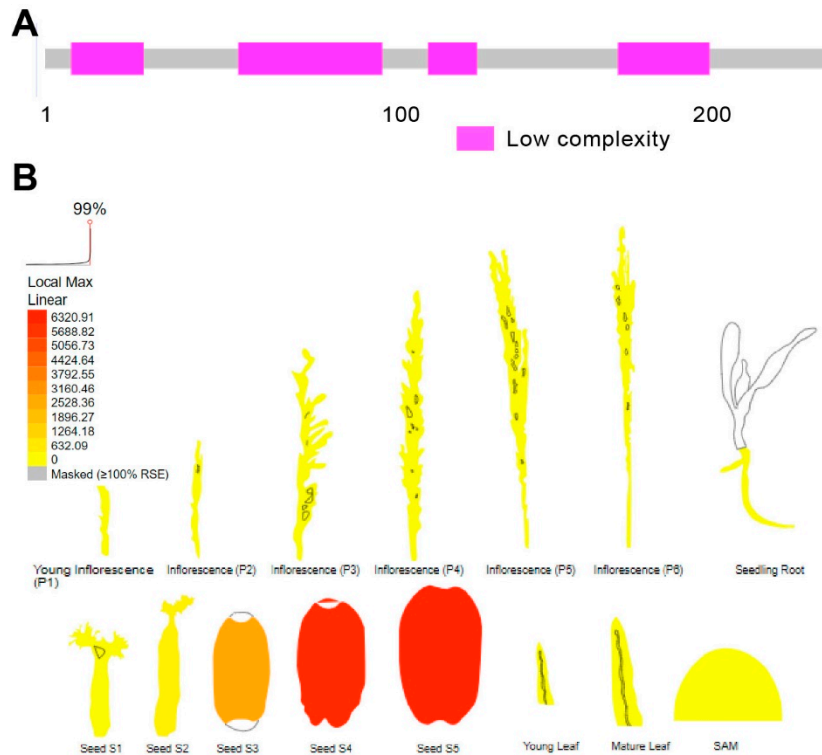

Figure S2. Structure and expression pattern prediction of *OsLEA1b*.

**(A)** Predicted structure of *OsLEA1b* from website (<http://smart.embl-heidelberg.de>). Pink box represent the low complexity region. **(B)** Tissue expression pattern prediction of *OsLEA1b* on the website ([https://bar.utoronto.ca/eplant\\_rice/](https://bar.utoronto.ca/eplant_rice/)).

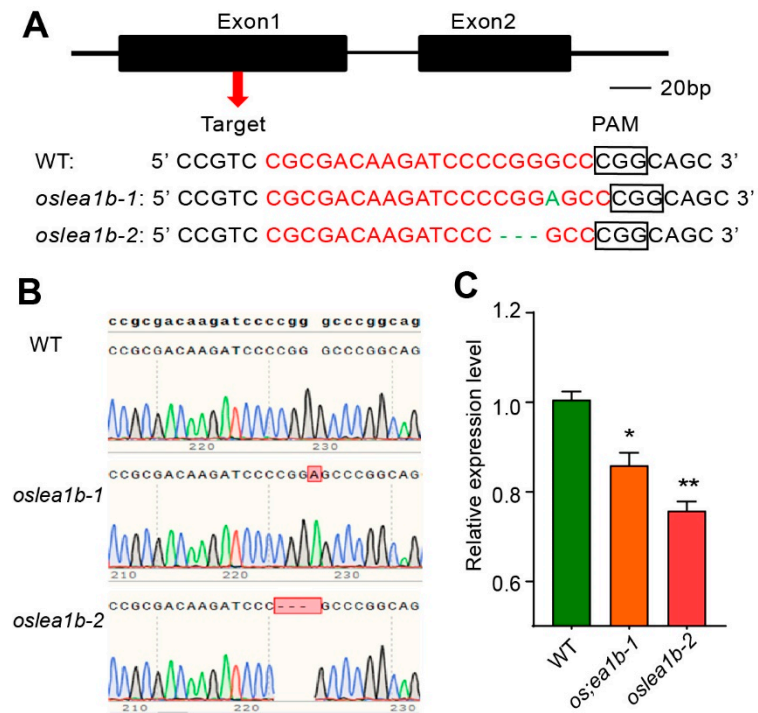

Figure S3. CRISPR/Cas9 mediated editing lines of *OsLEA1b*.

**(A, B)** Gene structure of *OsLEA1b* and sequencing of CRISPR/Cas9 target region in WT and T<sub>0</sub> plants. Scale bars, 20 bp. **(C)** Relative expression level of *OsLEA1b* in transgenic knock out plants (*oslea1b-1,2*). Data are means  $\pm$  SD from not less than three biological replicates. Statistically significant differences were determined using Student's *t*-test (\*,  $P < 0.05$ , \*\*,  $P < 0.01$ ).

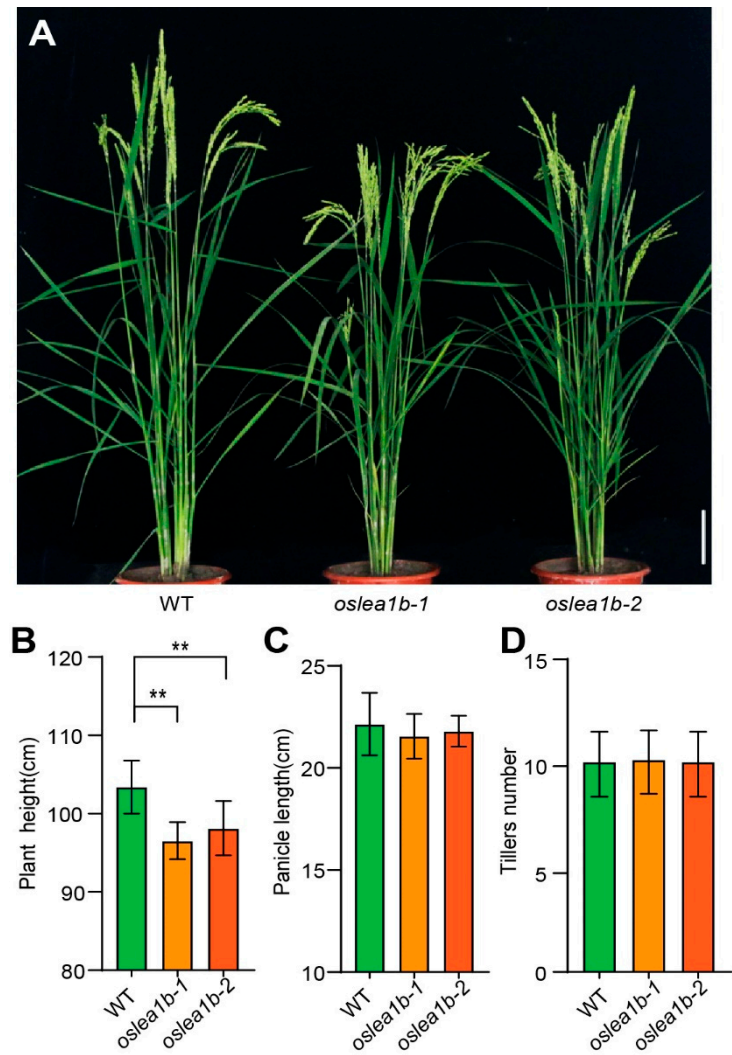

Figure S4. Appearance analysis of WT and *oslea1b* mutants.

**(A)** The plant phenotype of WT and *oslea1b* mutants after heading. Scale bars, 15 cm. **(B-D)**. Statistics of plant height, panicle length and tillering number of wild type and mutants. Data are means  $\pm$  SD from not less than three biological replicates. Statistically significant differences were determined using Student's *t*-test (\*\*,  $P < 0.01$ ).

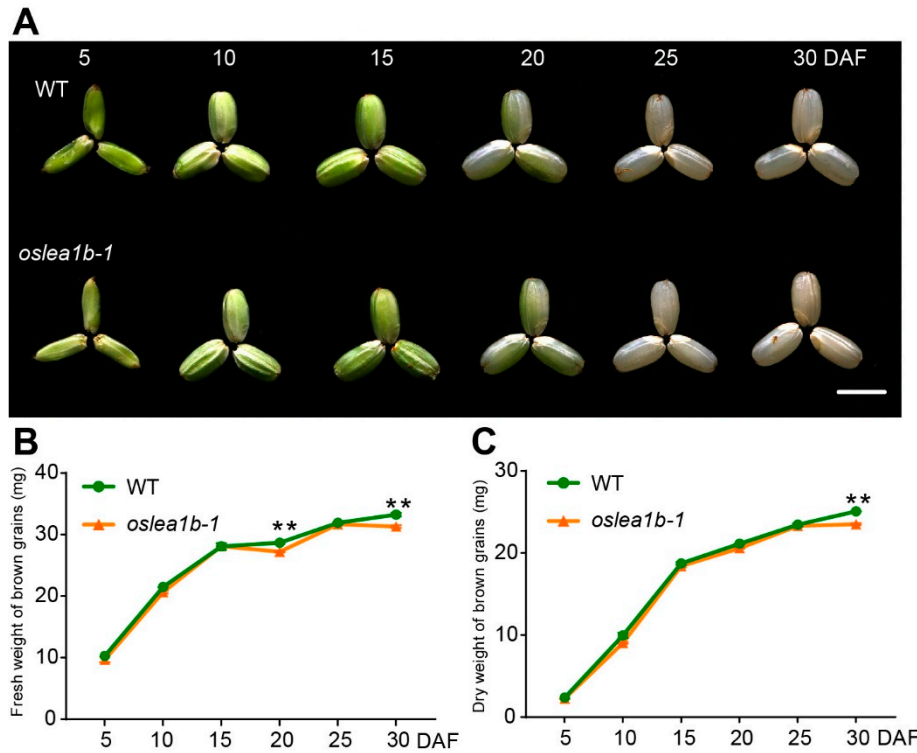

Figure S5. Grains filling of WT and *oslea1b* mutants.

(A) Fresh grains of WT and *oslea1b* at various stages of development. DAF, days after fertilization. Scale bars, 5 mm. (B, C) Weight of fresh and dry grains of WT and *oslea1b* at various stages of grain filling. Data are means  $\pm$  SD from not less than three biological replicates. Statistically significant differences were determined using Student's *t*-test (\*\*,  $P < 0.01$ ).

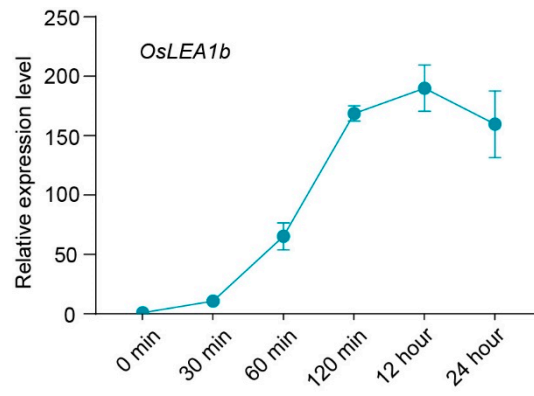

Figure S6. High temperature induces the expression of *OsLEA1b*.  
Relative expression level of *OsLEA1b* after high temperature treatment within 24 hours.

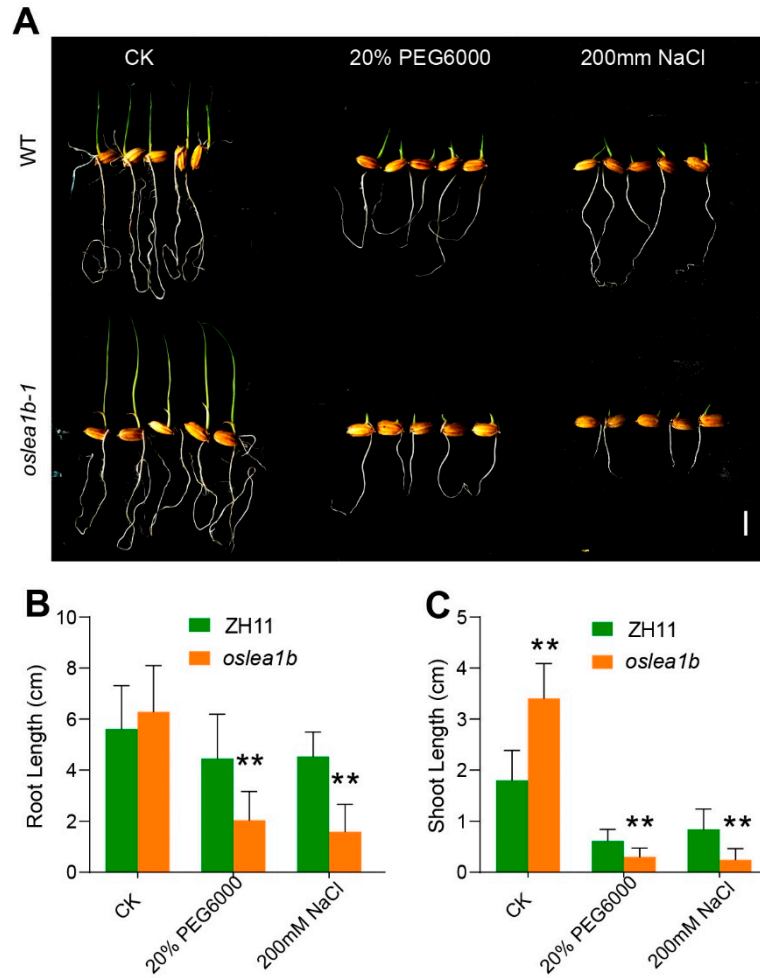

Figure S7. OsLEA1b is a positive regulator of drought tolerance.

**(A)** The phenotype of WT and *oslea1b* mutants under 20% PEG6000 and 200 mM NaCl treatment for 1 week. Scale bars, 5 mm. **(B, C)** The root and shoot length of the *oslea1b* mutants under 20% PEG6000 and 200 mM NaCl treatment for 1 week. Data are means  $\pm$  SD from not less than three biological replicates. Statistically significant differences were determined using Student's *t*-test (\*\*,  $P < 0.01$ ).

**Table S1. Primers used in this study**

| Use                      | Primer name          | Sequence (5' to 3')                 |
|--------------------------|----------------------|-------------------------------------|
| CRISPR/Cas9              | Cas9-OsLEA1b-F       | CAGCGCGACAAGATCCCCGGGCC             |
|                          | Cas9-OsLEA1b-R       | AACGGCCCGGGGATCTTGTCGCG             |
|                          | Cas9-OsLEA1b-check-F | AAGCAGAGAGCGAAGCAAGCTCGAA           |
|                          | Cas9-OsLEA1b-check-R | GCTACTTCTCCTCCGACGACGGCTGAG         |
| GUS expression           | 1305-GUS-OsLEA1b-F   | CCATGATTACGAATTCTATCCTTACAAGTTGTTT  |
|                          | 1305-GUS-OsLEA1b-R   | CTCAGATCTACCATGGTGATCAGATGATCTTGGTC |
| Subcellular localization | OsLEA1b-GFP-F        | GGTACCTGCAACTAGTATGGCGTCCATGCAGAAGA |
|                          | OsLEA1b-GFP-R        | TGCTCACCATGGATCCGCGGCGGCCACCACATCT  |
| q-RT-PCR                 | OsLEA1b-F            | CGGCGACGGAGAACATCTA                 |
|                          | OsLEA1b-R            | CTCCGGCATCGTCATCTCT                 |
|                          | BEI-F                | TGGCCATGGAAGAGTTGGC                 |
|                          | BEI-R                | CAGAAGCAACTGCTCCACC                 |
|                          | SSIIIa-F             | GCCTGCCCTGGACTACATTG                |
|                          | SSIIIa-R             | GCAAACATATGTACACGGTTCTGG            |
|                          | PUL-F                | ACCTTTCTTCCATGCTGG                  |
|                          | PUL-R                | CAAAGGTCTGAAAGATGGG                 |
|                          | ISA3-F               | ACAGCTTGAGACACTGGGTTGAG             |
|                          | ISA3-R               | ACAGCTTGAGACACTGGGTTGAG             |
|                          | GBSSI-F              | TCCGTCATTCTGGAGAA                   |
|                          | GBSSI-R              | CTTTGAAGTATGGGTTGTTGT               |
|                          | BEIIb-F              | ATGCTAGAGTTTGACCGC                  |
|                          | BEIIb-R              | AGTGTGATGGATCCTGCC                  |
|                          | OsBT1-F              | GAGGTCTTCCGCTGGATCAT                |
|                          | OsBT1-R              | TGAAATGCTCGATGGCCTTG                |
|                          | SBE1-F               | GCTGAAGATGTTTCGGGCAT                |
|                          | SBE1-R               | CATTGACCATTGCGGTCCT                 |
|                          | RAG2-F               | TGCTCCTCATCATCGTCTCC                |
|                          | RAG2-R               | TGCTCCTCATCATCGTCTCC                |
|                          | GLUD1-F              | TGAACCAAGGCAGAAGGAGT                |
|                          | GLUD1-R              | GCCTCGCTAAGTACCTCAGT                |
